# Supplementary material for: Clinical decision support improves physician guideline adherence for laboratory monitoring of chronic kidney disease: a matched cohort study
Source: Springer Nature journal article supplement (doi:10.1186/s12882-015-0159-5), 2015-10-15

## Graphs

### eGFR

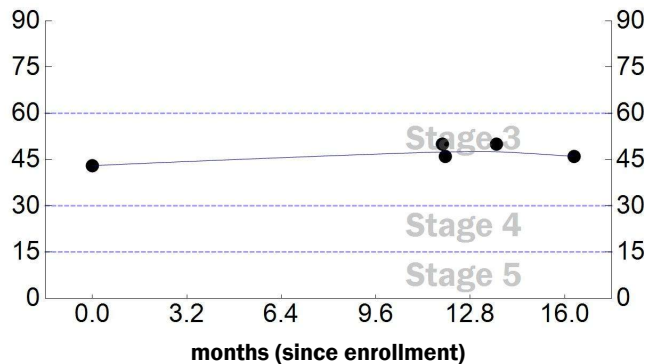

### Blood Pressure

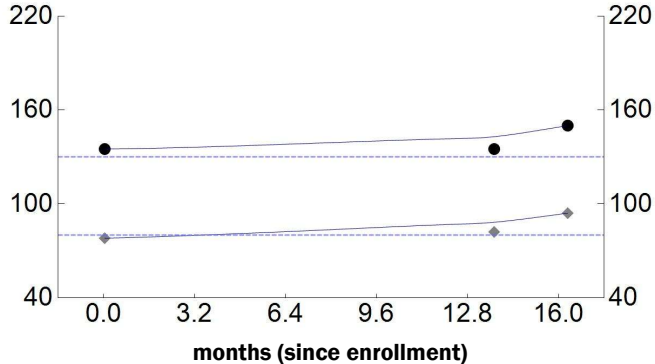

- = plotted based on date measured
- ◆ = plotted based on date reported (date measured unknown)

### PTH

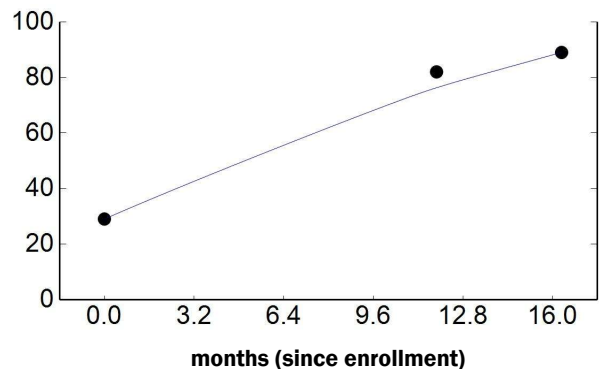

### Corrected Calcium

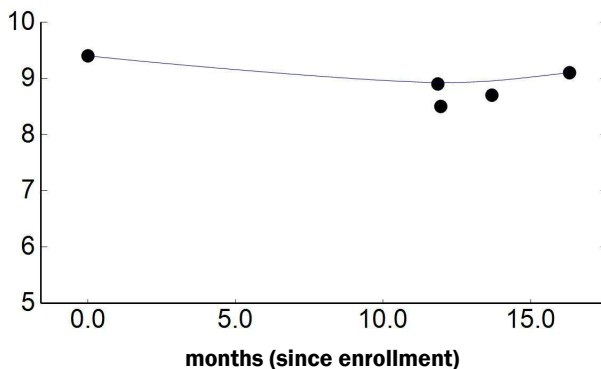

### Hemoglobin

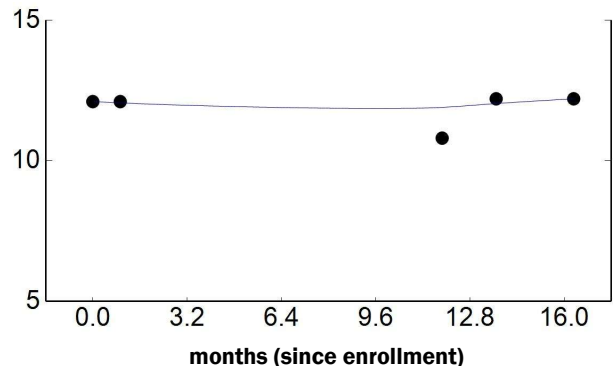

### Phosphorus

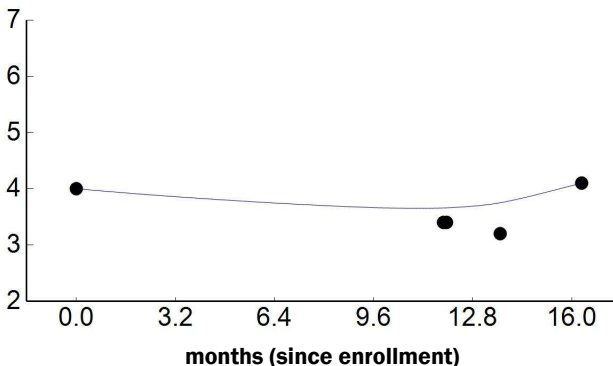

Supplement: MOESM4 [file 9741818]
